# Supplementary material
Source: publisher figshare collection journal article supplement (https://frontiersin.figshare.com/ndownloader/files/25607084)
Supplement: Supplementary file 1 [file 25607084]

## Sheet: 220 beach surveys
	List of the 220 beach surveys divided in the 36 regions with survey date, total amount of litter and litter pieces/m²
	Nr.	Country	Region	survey	coordinates	Date	total litter	area m²	litter pieces/m²
	1	Sweden	Umea	SE 1	63°40'5.43"N 20° 1'56.32"E	2017-07-27	5	50	0.1
	2	Sweden	Umea	SE 2	63°39'25.70"N 20° 7'47.39"E	2017-07-28	56	52.5	1.06667
	3	Sweden	Umea	SE 3	63°39'20.77"N 20° 7'32.11"E	2017-07-29	81	50	1.62
	4	Sweden	Umea	SE 4	63°39'44.00"N 20° 5'36.56"E	2017-07-30	122	52.5	2.32381
	5	Sweden	Umea	SE 5	63°39'43.68"N 20° 5'29.32"E	2017-07-31	31	52.5	0.590476
	6	Sweden	Gävle	SE 6	60°38'44.12"N 17°25'35.71"E	2017-07-29	15	60	0.25
	7	Sweden	Gävle	SE 7	60°38'43.96"N 17°25'41.36"E	2017-07-29	51	52.5	0.971429
	8	Sweden	Gävle	SE 8	60°38'26.46"N 17°28'23.98"E	2017-07-29	25	60	0.416667
	9	Sweden	Gävle	SE 9	60°38'27.74"N 17°28'12.90"E	2017-07-29	28	50	0.56
	10	Sweden	Nyköping	SE 10	58°43'27.04"N 17° 6'48.09"E	2017-07-30	19	52.5	0.361905
	11	Sweden	Nyköping	SE 11	58°43'28.70"N 17° 6'50.86"E	2017-07-30	74	50	1.48
	12	Sweden	Nyköping	SE 12	58°43'8.89"N 17° 5'27.06"E	2017-07-30	10	52.5	0.190476
	13	Sweden	Nyköping	SE 13	58°43'5.54"N 17° 5'21.64"E	2017-07-30	5	50	0.1
	14	Sweden	Oland north	SE 14	57°16'58.12"N 17° 3'45.39"E	2017-08-01	16	60	0.266667
	15	Sweden	Oland north	SE 15	57°17'0.52"N 17° 3'49.14"E	2017-08-01	13	52.5	0.247619
	16	Sweden	Oland north	SE 16	57°14'58.45"N 17° 3'57.99"E	2017-08-01	13	50	0.26
	17	Sweden	Oland north	SE 17	56°57'7.83"N 16°53'19.63"E	2017-08-01	6	60	0.1
	18	Sweden	Oland north	SE 18	56°57'10.87"N 16°53'19.87"E	2017-08-01	10	52.5	0.190476
	19	Sweden	Kivik	SE 19	55°42'1.87"N 14°12'20.32"E	2017-08-03	21	52.5	0.4
	20	Sweden	Kivik	SE 20	55°41'59.77"N 14°12'23.25"E	2017-08-03	113	50	2.26
	21	Sweden	Kivik	SE 21	55°41'21.66"N 14°13'24.11"E	2017-08-03	44	50	0.88
	22	Sweden	Kivik	SE 22	55°41'19.07"N 14°13'26.32"E	2017-08-03	70	50	1.4
	23	Sweden	Ystad	SE 23	55°24'29.42"N 14°13'11.62"E	2017-08-04	2	50	0.04
	24	Sweden	Ystad	SE 24	55°24'24.75"N 14°13'8.59"E	2017-08-04	1	50	0.02
	25	Sweden	Ystad	SE 25	55°25'50.52"N 13°56'40.67"E	2017-08-04	17	60	0.283333
	26	Sweden	Ystad	SE 26	55°25'51.14"N 13°56'37.24"E	2017-08-04	22	50	0.44
	27	Sweden	Ystad	SE 27	55°25'45.75"N 13°51'44.14"E	2017-08-04	6	50	0.12
	28	Sweden	Falsterbo	SE 28	55°23'33.39"N 12°52'7.80"E	2017-07-24	14	50	0.28
	29	Sweden	Falsterbo	SE 29	55°23'33.77"N 12°52'12.63"E	2017-07-25	214	52	4.11538
	30	Sweden	Falsterbo	SE 30	55°24'59.26"N 12°50'1.52"E	2017-08-05	44	50	0.88
	31	Sweden	Falsterbo	SE 31	55°25'1.80"N 12°50'5.32"E	2017-08-05	28	50	0.56
	32	Denmark	Koge Bay	DK 1	55°32'6.97"N 12°13'58.17"E	2017-08-19	33	55	0.6
	33	Denmark	Koge Bay	DK 2	55°32'4.28"N 12°13'55.93"E	2017-08-19	14	52.5	0.266667
	34	Denmark	Koge Bay	DK 3	55°30'56.97"N 12°13'11.51"E	2017-08-19	24	51	0.470588
	35	Denmark	Koge Bay	DK 4	55°30'53.41"N 12°13'9.81"E	2017-08-19	9	50	0.18
	36	Denmark	Koge Bay	DK 5	55°29'18.79"N 12°12'20.71"E	2017-08-19	0	52	0
	37	Denmark	Koge Bay	DK 6	55°29'15.90"N 12°12'18.87"E	2017-08-19	8	56	0.142857
	38	Denmark	Faxe Bay	DK 7	55°13'15.05"N 12°10'59.39"E	2018-08-18	6	50	0.12
	39	Denmark	Faxe Bay	DK 8	55°13'13.36"N 12°10'55.76"E	2018-08-18	11	52.5	0.209524
	40	Denmark	Faxe Bay	DK 9	55°12'20.68"N 12° 8'55.08"E	2018-08-18	10	27	0.37037
	41	Denmark	Faxe Bay	DK 10	55°12'16.77"N 12° 8'51.76"E	2018-08-18	8	25	0.32
	42	Denmark	Faxe Bay	DK 11	55° 7'51.61"N 12° 7'24.97"E	2018-08-18	11	26	0.423077
	43	Denmark	Faxe Bay	DK 12	55° 7'52.11"N 12° 7'29.48"E	2018-08-18	2	28	0.0714286
	44	Denmark	Hjelm Bay	DK 13	54°52'51.99"N 12° 9'6.55"E	2018-07-17	3	52	0.0576923
	45	Denmark	Hjelm Bay	DK 14	54°52'51.60"N 12° 9'10.84"E	2018-07-17	1	52	0.0192308
	46	Denmark	Hjelm Bay	DK 15	54°52'43.28"N 12°10'55.49"E	2018-07-17	0	26	0
	47	Denmark	Hjelm Bay	DK 16	54°52'42.82"N 12°10'49.99"E	2018-07-17	1	27	0.037037
	48	Denmark	Hjelm Bay	DK 17	54°54'35.96"N 12°14'34.29"E	2018-07-17	4	26	0.153846
	49	Denmark	Hjelm Bay	DK 18	54°54'39.24"N 12°14'37.90"E	2018-07-17	1	26	0.0384615
	50	Denmark	Falster (south)	DK 19	54°33'47.35"N 11°58'23.67"E	2018-07-16	0	50	0
	51	Denmark	Falster (south)	DK 20	54°33'49.28"N 11°58'24.17"E	2018-07-16	2	50	0.04
	52	Denmark	Falster (south)	DK 21	54°34'42.62"N 11°58'23.55"E	2018-07-16	3	51	0.0588235
	53	Denmark	Falster (south)	DK 22	54°34'38.71"N 11°58'24.86"E	2018-07-16	3	50	0.06
	54	Denmark	Falster (south)	DK 23	54°36'10.91"N 11°58'6.56"E	2018-07-16	1	50	0.02
	55	Denmark	Falster (south)	DK 24	54°36'14.80"N 11°58'5.75"E	2018-07-16	3	50	0.06
	56	Germany	Rostock	DE 1	54°11'1.67"N 12° 5'10.60"E	2018-09-06	77	50	1.54
	57	Germany	Rostock	DE 2	54°11'1.66"N 12° 5'7.58"E	2018-09-06	90	50	1.8
	58	Germany	Rostock	DE 3	54°10'38.33"N 12° 3'21.31"E	2018-10-12	19	50	0.38
	59	Germany	Rostock	DE 4	54°10'38.10"N 12° 3'15.91"E	2018-10-12	31	60	0.516667
	60	Germany	Rostock	DE 5	54° 9'51.49"N 11°56'37.34"E	2018-09-13	28	54	0.518519
	61	Germany	Rostock	DE 6	54° 9'52.11"N 11°56'41.71"E	2018-09-13	13	52	0.25
	62	Germany	Rostock	DE 7	54°10'42.13"N 12° 6'16.21"E	2018-09-14	17	50	0.34
	63	Germany	Rostock	DE 8	54°10'41.92"N 12° 6'22.11"E	2018-09-14	27	52	0.519231
	64	Germany	Rostock	DE 9	54°11'19.51"N 12° 7'58.07"E	2018-09-14	38	56	0.678571
	65	Germany	Rostock	DE 10	54°11'21.77"N 12° 8'1.73"E	2018-09-14	23	58	0.396552
	66	Germany	Rostock	DE 11	54°12'22.40"N 12° 9'14.93"E	2018-10-11	9	50	0.18
	67	Germany	Rostock	DE 12	54°12'26.16"N 12° 9'18.64"E	2018-10-11	99	52.5	1.88571
	68	Germany	Darss-Zingst	DE 13	54°22'33.95"N 12°24'22.68"E	2018-07-05	27	52.5	0.514286
	69	Germany	Darss-Zingst	DE 14	54°22'36.49"N 12°24'25.83"E	2018-07-05	23	50	0.46
	70	Germany	Darss-Zingst	DE 15	54°23'12.03"N 12°25'41.26"E	2018-07-05	5	51	0.0980392
	71	Germany	Darss-Zingst	DE 16	54°23'14.10"N 12°25'45.10"E	2018-07-05	5	52.5	0.0952381
	72	Germany	Darss-Zingst	DE 17	54°24'31.06"N 12°27'22.67"E	2018-07-05	13	52.5	0.247619
	73	Germany	Darss-Zingst	DE 18	54°24'33.39"N 12°27'24.62"E	2018-07-05	10	51	0.196078
	74	Poland	Świnoujście	PL1	53°55'19.33"N 14°15'53.71"E	2018-06-18	20	50	0.4
	75	Poland	Świnoujście	PL2	53°55'18.61"N 14°15'57.70"E	2018-06-18	19	52.5	0.361905
	76	Poland	Świnoujście	PL3	53°55'34.67"N 14°14'4.23"E	2018-06-18	19	50	0.38
	77	Poland	Świnoujście	PL4	53°55'36.00"N 14°13'59.66"E	2018-06-18	35	55	0.636364
	78	Poland	Świnoujście	PL5	53°56'28.56"N 14°11'43.17"E	2018-06-18	111	70	1.58571
	79	Poland	Świnoujście	PL6	53°56'30.14"N 14°11'38.33"E	2018-06-18	49	70	0.7
	80	Poland	Ustka	PL7	54°35'19.55"N 16°51'22.39"E	2018-06-19	60	53	1.13208
	81	Poland	Ustka	PL8	54°35'19.57"N 16°51'28.58"E	2018-06-19	85	50	1.7
	82	Poland	Ustka	PL9	54°35'25.67"N 16°53'3.86"E	2018-06-19	18	52.5	0.342857
	83	Poland	Ustka	PL10	54°35'27.06"N 16°53'10.88"E	2018-06-19	7	52.5	0.133333
	84	Poland	Ustka	PL11	54°35'58.50"N 16°55'2.69"E	2018-06-19	16	50	0.32
	85	Poland	Ustka	PL12	54°36'0.05"N 16°55'7.05"E	2018-06-19	10	50	0.2
	86	Poland	Sopot	PL13	54°26'48.21"N 18°34'19.27"E	2018-06-20	144	58	2.48276
	87	Poland	Sopot	PL14	54°26'47.10"N 18°34'20.50"E	2018-06-20	165	58	2.84483
	88	Poland	Sopot	PL15	54°26'3.21"N 18°35'6.17"E	2018-06-21	58	62	0.935484
	89	Poland	Sopot	PL16	54°26'1.82"N 18°35'9.14"E	2018-06-21	20	51	0.392157
	90	Poland	Sopot	PL17	54°24'44.84"N 18°37'39.52"E	2018-06-21	366	55	6.65455
	91	Poland	Sopot	PL18	54°24'43.44"N 18°37'42.96"E	2018-06-21	248	58	4.27586
	92	Russia	Kaliningrad south	RU 1	54°40'4.58"N 19°53'56.85"E	2019-07-15	29	50	0.58
	93	Russia	Kaliningrad south	RU 2	54°40'7.45"N 19°54'0.13"E	2019-07-15	49	50	0.98
	94	Russia	Kaliningrad south	RU 3	54°40'56.27"N 19°54'44.68"E	2019-07-15	31	50	0.62
	95	Russia	Kaliningrad south	RU 4	54°40'58.55"N 19°54'47.48"E	2019-07-15	55	50	1.1
	96	Russia	Kaliningrad south	RU 5	54°42'37.22"N 19°56'2.80"E	2019-07-15	139	50	2.78
	97	Russia	Kaliningrad south	RU 6	54°42'39.58"N 19°56'5.17"E	2019-07-15	53	50	1.06
	98	Russia	Kaliningrad north	RU 7	54°58'4.46"N 20°29'45.63"E	2019-07-22	138	50	2.76
	99	Russia	Kaliningrad north	RU 8	54°58'5.71"N 20°29'51.71"E	2019-07-22	129	50	2.58
	100	Russia	Kaliningrad north	RU 9	54°58'43.85"N 20°31'35.01"E	2019-07-22	163	50	3.26
	101	Russia	Kaliningrad north	RU 10	54°58'45.66"N 20°31'38.62"E	2019-07-22	130	50	2.6
	102	Russia	Kaliningrad north	RU 11	54°59'29.84"N 20°33'29.65"E	2019-07-22	119	50	2.38
	103	Russia	Kaliningrad north	RU 12	54°59'31.42"N 20°33'33.39"E	2019-07-22	129	50	2.58
	104	Lithuania	Curonian spit	LT 1	55°17'14.86"N 20°57'39.80"E	2017-07-25	37	50	0.74
	105	Lithuania	Curonian spit	LT 2	55°17'17.66"N 20°57'42.62"E	2017-07-25	50	60	0.833333
	106	Lithuania	Curonian spit	LT 3	55°18'0.17"N 20°58'19.62"E	2017-07-25	52	52.5	0.990476
	107	Lithuania	Curonian spit	LT 4	55°18'2.96"N 20°58'22.62"E	2017-07-25	33	52.5	0.628571
	108	Lithuania	Curonian spit	LT 5	55°19'39.96"N 20°59'39.69"E	2017-07-25	44	60	0.733333
	109	Lithuania	Curonian spit	LT 6	55°19'42.84"N 20°59'41.73"E	2017-07-25	32	70	0.457143
	110	Lithuania	Curonian spit	LT 7	55°25'18.73"N 21° 3'23.15"E	2017-07-27	41	52.5	0.780952
	111	Lithuania	Curonian spit	LT 8	55°25'21.84"N 21° 3'25.09"E	2017-07-27	59	52.5	1.12381
	112	Lithuania	Curonian spit	LT 9	55°26'30.72"N 21° 3'55.93"E	2017-07-27	58	52.5	1.10476
	113	Lithuania	Curonian spit	LT 10	55°26'33.78"N 21° 3'57.29"E	2017-07-27	66	52.5	1.25714
	114	Lithuania	Curonian spit	LT 11	55°27'53.35"N 21° 4'26.93"E	2017-07-27	51	52.5	0.971429
	115	Lithuania	Curonian spit	LT 12	55°27'56.52"N 21° 4'28.02"E	2017-07-27	60	52.5	1.14286
	116	Lithuania	Curonian spit	LT 13	55°37'49.76"N 21° 6'23.90"E	2017-08-17	8	50	0.16
	117	Lithuania	Curonian spit	LT 14	55°37'52.99"N 21° 6'23.66"E	2017-08-17	3	50	0.06
	118	Lithuania	Curonian spit	LT 15	55°39'18.16"N21° 6'18.72"E	2017-08-17	11	65	0.169231
	119	Lithuania	Curonian spit	LT 16	55°39'21.65"N 21° 6'18.36"E	2017-08-17	14	50	0.28
	120	Lithuania	Curonian spit	LT 17	55°40'37.66"N 21° 6'10.57"E	2017-08-17	20	52.5	0.380952
	121	Lithuania	Curonian spit	LT 18	55°40'40.95"N 21° 6'9.85"E	2017-08-17	9	50	0.18
	122	Lithuania	Klaipeda / Palanga	LT 19	55°44'19.42"N 21° 5'5.99"E	2017-07-30	83	50	1.66
	123	Lithuania	Klaipeda / Palanga	LT 20	55°44'22.59"N 21° 5'4.51"E	2017-07-30	53	50	1.06
	124	Lithuania	Klaipeda / Palanga	LT 21	55°45'22.18"N 21° 4'54.60"E	2017-07-30	41	52.5	0.780952
	125	Lithuania	Klaipeda / Palanga	LT 22	55°45'25.41"N 21° 4'54.34"E	2017-07-30	43	52.5	0.819048
	126	Lithuania	Klaipeda / Palanga	LT 23	55°46'40.31"N 21° 4'24.71"E	2017-07-30	104	52.5	1.98095
	127	Lithuania	Klaipeda / Palanga	LT 24	55°46'43.63"N 21° 4'23.40"E	2017-07-30	141	52.5	2.68571
	128	Lithuania	Klaipeda / Palanga	LT 25	55°52'24.05"N 21° 3'20.03"E	2017-08-08	121	52.5	2.30476
	129	Lithuania	Klaipeda / Palanga	LT 26	55°52'27.22"N 21° 3'18.87"E	2017-08-08	81	52.5	1.54286
	130	Lithuania	Klaipeda / Palanga	LT 27	55°54'57.15"N 21° 3'0.40"E	2017-08-10	38	57.5	0.66087
	131	Lithuania	Klaipeda / Palanga	LT 28	55°55'0.49"N 21° 2'59.64"E	2017-08-10	38	52.5	0.72381
	132	Latvia	Liepāja	LV 1	56°31'6.74"N 20°59'1.18"E	2017-08-23	15	50	0.3
	133	Latvia	Liepāja	LV 2	56°31'9.33"N 20°58'59.86"E	2017-08-23	7	50	0.14
	134	Latvia	Liepāja	LV 3	56°33'8.26"N 20°59'57.16"E	2017-08-23	102	50	2.04
	135	Latvia	Liepāja	LV 4	56°33'14.71"N20°59'56.31"E	2017-08-23	466	50	9.32
	136	Latvia	Liepāja	LV 5	56°33'29.82"N 21° 0'1.92"E	2017-08-23	12	52.5	0.228571
	137	Latvia	Liepāja	LV 6	56°33'33.19"N 21° 0'3.63"E	2017-08-23	7	50	0.14
	138	Latvia	Ventspils	LV 7	57°23'13.65"N 21°31'30.98"E	2018-09-10	16	75	0.213333
	139	Latvia	Ventspils	LV 8	57°23'16.59"N 21°31'34.53"E	2018-09-10	0	75	0
	140	Latvia	Ventspils	LV 9	57°23'49.95"N 21°31'49.04"E	2018-09-10	18	90	0.2
	141	Latvia	Ventspils	LV 10	57°23'53.75"N 21°31'50.31"E	2018-09-10	15	110	0.136364
	142	Latvia	Cape Kolka	LV 11	57°45'16.30"N22°33'39.24"E	2017-08-01	24	50	0.48
	143	Latvia	Cape Kolka	LV 12	57°45'17.03"N 22°33'45.72"E	2017-08-01	16	52.5	0.304762
	144	Latvia	Cape Kolka	LV 13	57°45'29.82"N 22°35'27.98"E	2017-08-01	11	50	0.22
	145	Latvia	Cape Kolka	LV 14	57°45'30.57"N 22°35'36.10"E	2017-08-01	23	52.5	0.438095
	146	Latvia	Cape Kolka	LV 15	57°44'5.64"N 22°35'15.72"E	2017-08-01	25	50	0.5
	147	Latvia	Gulf of Riga	LV 16	56°58'44.39"N 23°48'35.20"E	2017-08-16	14	50	0.28
	148	Latvia	Gulf of Riga	LV 17	56°58'45.25"N 23°48'41.05"E	2017-08-16	27	50	0.54
	149	Latvia	Gulf of Riga	LV 18	56°59'6.94"N 23°50'38.58"E	2017-08-16	9	52.5	0.171429
	150	Latvia	Gulf of Riga	LV 19	56°59'8.18"N 23°50'44.56"E	2017-08-16	20	52.5	0.380952
	151	Latvia	Gulf of Riga	LV 20	56°59'49.25"N 23°53'44.09"E	2017-08-16	5	50	0.1
	152	Latvia	Gulf of Riga	LV 21	56°59'50.72"N 23°53'49.41"E	2017-08-16	8	52.5	0.152381
	153	Latvia	Gulf of Riga	LV 22	57° 8'21.74"N 24°14'9.56"E	2017-08-16	9	50	0.18
	154	Latvia	Gulf of Riga	LV 23	57° 8'24.51"N 24°14'12.60"E	2017-08-16	12	52.5	0.228571
	155	Latvia	Gulf of Riga	LV 24	57° 9'55.25"N 24°16'41.46"E	2017-08-16	16	52.5	0.304762
	156	Latvia	Gulf of Riga	LV 25	57° 9'57.09"N 24°16'46.34"E	2017-08-16	9	52.5	0.171429
	157	Latvia	Gulf of Riga	LV 26	57°11'17.06"N 24°19'37.70"E	2017-08-16	25	50	0.5
	158	Latvia	Gulf of Riga	LV 27	57°11'19.27"N 24°19'42.05"E	2017-08-16	6	52.5	0.114286
	159	Estonia	Häädemeeste	EE 1	57°55'31.39"N 24°23'11.99"E	2017-08-15	9	50	0.18
	160	Estonia	Häädemeeste	EE 2	57°56'17.57"N 24°23'28.19"E	2017-08-15	1	50	0.02
	161	Estonia	Pärnu Bay	EE 3	58°23'11.23"N 24°23'54.63"E	2017-08-15	18	50	0.36
	162	Estonia	Pärnu Bay	EE 4	58°23'11.19"N 24°23'48.48"E	2017-08-15	2	50	0.04
	163	Estonia	Pärnu Bay	EE 5	58°23'10.17"N 24°21'56.39"E	2017-08-15	15	52.5	0.285714
	164	Estonia	Pärnu Bay	EE 6	58°23'10.51"N 24°21'50.27"E	2017-08-15	22	50	0.44
	165	Estonia	Lääne north	EE 7	59° 9'19.93"N 23°31'1.86"E	2017-09-04	15	50	0.3
	166	Estonia	Lääne north	EE 8	59°13'16.34"N 23°36'4.49"E	2017-09-04	3	52.5	0.0571429
	167	Estonia	Lääne north	EE 9	59°13'18.09"N 23°36'9.80"E	2017-09-04	9	52.5	0.171429
	168	Estonia	Lääne north	EE 10	59°13'58.03"N 23°43'24.91"E	2017-09-04	8	50	0.16
	169	Estonia	Lääne north	EE 11	59°13'59.63"N 23°43'30.38"E	2017-09-04	13	52.5	0.247619
	170	Estonia	Tallinn	EE 12	59°26'22.39"N 24°40'55.10"E	2017-09-05	733	52.5	13.9619
	171	Estonia	Tallinn	EE 13	59°26'26.70"N 24°40'56.76"E	2017-09-05	255	50	5.1
	172	Estonia	Tallinn	EE 14	59°28'20.33"N 24°49'51.56"E	2017-09-05	159	52.5	3.02857
	173	Estonia	Tallinn	EE 15	59°28'23.22"N 24°49'54.41"E	2017-09-05	144	52.5	2.74286
	174	Estonia	Tallinn	EE 16	59°30'37.13"N 24°48'52.54"E	2017-09-05	41	50	0.82
	175	Estonia	Tallinn	EE 17	59°30'40.34"N 24°48'51.91"E	2017-09-05	56	50	1.12
	176	Estonia	Jõelähtme	EE 18	59°34'34.73"N 25°31'37.70"E	2017-09-06	10	50	0.2
	177	Estonia	Jõelähtme	EE 19	59°34'39.97"N 25°42'22.68"E	2017-09-06	7	52.5	0.133333
	178	Estonia	Jõelähtme	EE 20	59°34'43.21"N 25°42'25.70"E	2017-09-06	7	52.5	0.133333
	179	Estonia	Jõelähtme	EE 21	59°35'58.85"N 25°42'46.64"E	2017-09-06	4	52.5	0.0761905
	180	Russia	St. Petersburg	RU 13	60° 1'30.58"N 29°40'9.74"E	2018-07-09	41	50	0.82
	181	Russia	St. Petersburg	RU 14	60° 1'42.44"N 29°40'3.74"E	2018-07-09	92	50	1.84
	182	Russia	St. Petersburg	RU 15	60° 1'59.90"N 29°57'28.54"E	2018-07-05	407	50	8.14
	183	Russia	St. Petersburg	RU 16	60° 8'23.90"N 29°55'48.86"E	2018-07-09	112	50	2.24
	184	Russia	St. Petersburg	RU 17	60° 8'43.90"N 29°55'29.60"E	2018-06-29	49	50	0.98
	185	Russia	St. Petersburg	RU 18	60°10'26.82"N 29°47'57.91"E	2018-07-04	177	50	3.54
	186	Russia	St. Petersburg	RU 19	60°11'14.46"N 29°41'49.33"E	2018-07-11	34	50	0.68
	187	Russia	St. Petersburg	RU 20	60°11'14.92"N 29°41'48.42"E	2018-07-11	89	50	1.78
	188	Finland	Porvoo	FI 1	60°16'28.14"N 25°50'57.82"E	2017-09-11	72	52.5	1.37143
	189	Finland	Porvoo	FI 2	60°15'59.65"N 25°50'15.07"E	2017-09-11	79	50	1.58
	190	Finland	Helsinki	FI 3	60°12'7.79"N 25° 9'30.77"E	2017-09-07	44	50	0.88
	191	Finland	Helsinki	FI 4	60°12'4.93"N 25° 9'20.83"E	2017-09-07	28	50	0.56
	192	Finland	Helsinki	FI 5	60°10'29.76"N 24°54'27.16"E	2017-09-07	135	70	1.92857
	193	Finland	Helsinki	FI 6	60°11'35.78"N 24°52'18.07"E	2017-09-07	89	52.5	1.69524
	194	Finland	Helsinki	FI 7	60° 9'1.82"N 24°45'18.75"E	2017-09-07	48	50	0.96
	195	Finland	Hanko	FI 8	59°49'36.38"N 22°59'21.33"E	2017-09-10	17	50	0.34
	196	Finland	Hanko	FI 9	59°49'20.58"N 22°58'20.78"E	2017-09-10	95	50	1.9
	197	Finland	Hanko	FI 10	59°49'26.07"N 22°55'50.63"E	2017-09-10	205	50	4.1
	198	Finland	Rauma	FI 11	61° 8'10.37"N 21°28'24.86"E	2017-09-09	34	52.5	0.647619
	199	Finland	Rauma	FI 12	61° 8'13.86"N 21°28'18.84"E	2017-09-09	51	50	1.02
	200	Finland	Rauma	FI 13	61° 8'34.59"N 21°28'19.88"E	2017-09-09	34	50	0.68
	201	Finland	Pori	FI 14	61°33'56.09"N 21°31'13.82"E	2017-09-08	45	75	0.6
	202	Finland	Pori	FI 15	61°33'59.04"N 21°31'10.37"E	2017-09-08	11	55	0.2
	203	Finland	Pori	FI 16	61°34'43.77"N 21°29'23.28"E	2017-09-08	5	50	0.1
	204	Finland	Pori	FI 17	61°35'22.34"N 21°29'46.12"E	2017-09-08	5	60	0.0833333
	205	Finland	Pori	FI 18	61°35'25.13"N 21°29'41.91"E	2017-09-08	7	50	0.14
	206	Germany	North Sea	DE 19	55° 2'40.24"N 8°27'14.20"E	2018-09-19	1	51	0.0196078
	207	Germany	North Sea	DE 20	55° 2'51.18"N 8°27'21.68"E	2018-09-19	4	58	0.0689655
	208	Germany	North Sea	DE 21	55° 3'1.74"N 8°26'34.98"E	2016-05-10	9	50	0.18
	209	Germany	North Sea	DE 22	55° 2'19.14"N 8°23'7.44"E	2016-05-09	30	50	0.6
	210	Germany	North Sea	DE 23	55° 1'22.02"N 8°22'30.66"E	2018-09-19	58	70	0.828571
	211	Germany	North Sea	DE 24	54°57'42.00"N 8°19'51.32"E	2018-09-19	3	50	0.06
	212	Germany	North Sea	DE 25	54°54'15.06"N 8°17'44.16"E	2016-05-11	68	70	0.971429
	213	Germany	North Sea	DE 26	54°54'7.04"N 8°17'44.60"E	2018-09-19	20	50	0.4
	214	Germany	North Sea	DE 27	54°54'4.27"N 8°17'43.06"E	2018-09-19	21	60	0.35
	215	Germany	North Sea	DE 28	54°47'31.61"N 8°16'56.10"E	2018-09-19	69	51	1.35294
	216	Germany	North Sea	DE 29	54°47'28.22"N 8°16'55.25"E	2018-09-19	41	51	0.803922
	217	Germany	North Sea	DE 30	54°47'25.14"N 8°16'55.02"E	2016-05-10	30	55.5	0.540541
	218	Germany	North Sea	DE 31	54°45'55.92"N 8°16'49.08"E	2016-05-10	27	60	0.45
	219	Germany	North Sea	DE 32	54°45'4.50"N 8°17'37.94"E	2018-09-18	34	52.5	0.647619
	220	Germany	North Sea	DE 33	54°45'25.79"N 8°17'43.84"E	2018-09-18	10	50	0.2
